# Supplementary material for: Excited-state relaxation dynamics of Re(I) tricarbonyl complexes with macrocyclic phenanthroline ligands studied by time-resolved IR spectroscopy
Source: Royal Society of Chemistry journal article supplement (doi:10.1039/b820748h), 2009-01-01
Supplement: b820748h.pdf [file b820748h.pdf]

# Excited-State Relaxation Dynamics of Re(I) Tricarbonyl Complexes with Macrocyclic Phenanthroline Ligands Studied by Time-Resolved IR Spectroscopy

## SUPPLEMENTARY INFORMATION

Ana María Blanco-Rodríguez, Michael Towrie, Jean-Paul Collin, Stanislav Zálíš,

Antonín Vlček, Jr.

### Characterization of $[\text{Re}(\text{L})(\text{CO})_3(\text{phen-macrocycle})]^n$ complexes

#### $[\text{Re}(\text{Cl})(\text{CO})_3(\text{dap})]$

77 % yield

$^1\text{H-NMR}$   $\text{CDCl}_3$  270 MHz: 8.51 (2 H, d,  $J$  8.4 Hz, CHd), 8.00 (2 H, s, CHe), 7.89 (2 H, d,  $J$  8.2 Hz, CHc), 7.69 (4 H, d,  $J$  7.7 Hz, CHb), 7.06 (4 H, d,  $J$  8.4 Hz, CHa), 3.88 (2 H, s,  $\text{CH}_3$ )

FTIR ( $\text{CH}_2\text{Cl}_2$ )  $\nu(\text{CO}) = 2022(\text{s}), 1923(\text{b}), 1885(\text{b})$

Mass Spec.(ES)  $m/z$ : Calculated for  $\text{C}_{29}\text{H}_{20}\text{N}_2\text{O}_5$   $^{187}\text{Re}^+$  (M-Cl): 663.0930. Found: 663.0966

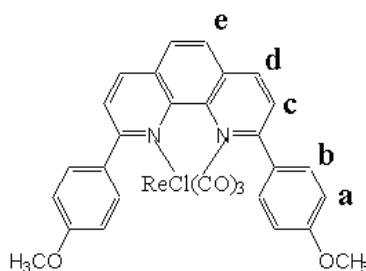

Structure of  $[\text{Re}(\text{Cl})(\text{CO})_3(\text{dap})]$ . Labels a-d show the NMR assignment.

#### $[\text{Re}(\text{Cl})(\text{CO})_3(\text{m30})]$

80% yield

$^1\text{H-NMR}$   $\text{CDCl}_3$  270 MHz: 8.53 (4 H, d,  $J$  8.4 Hz, CHd), 8.25 (2 H, d,  $J$  8.2 Hz, CHb), 8.07 (2 H, d,  $J$  8.4 Hz, CHc), 7.73 (2 H, s, CHe), 7.18 (4 H, d,  $J$  8.2 Hz, CHa), 4.33 (4 H, t,  $J$  4.7 Hz, CHf), 3.83 (4 H, t,  $J$  4.9 Hz, CHg), 3.71 (12 H, m, CHh)

FTIR ( $\text{CH}_2\text{Cl}_2$ )  $\nu(\text{CO}) = 2021(\text{s}), 1924(\text{b}), 1885(\text{b})$

Mass Spec.(ES)  $m/z$ : Calculated for  $\text{C}_{37}\text{H}_{34}\text{N}_2\text{O}_9$   $^{187}\text{Re}^+$  (M-Cl): 837.1822. Found: 837.1860

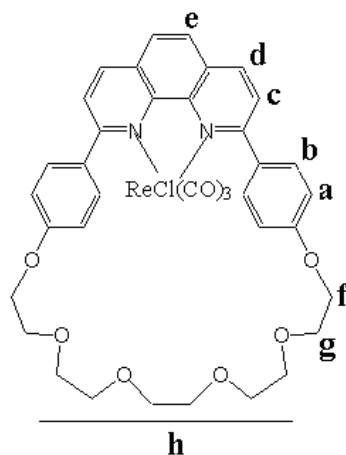

Structure of  $[\text{ReCl}(\text{CO})_3(\text{m30})]$ . Labels a-h show the NMR assignment.

### $[\text{Re}(\text{Cl})(\text{CO})_3(\text{m27})]$

82% yield

$^1\text{H-NMR}$   $\text{CDCl}_3$  270 MHz: 8.49 (2 H, d,  $J$  8.4 Hz, CHd), 7.96 (4 H, d,  $J$  8.4 Hz, CHb), 7.50 (2 H, d,  $J$  8.2 Hz, CHe), 7.49 (2 H, d,  $J$  8.4 Hz, CHc), 7.35 (4 H, d,  $J$  8.4 Hz, CHa), 7.15 (4 H, m, CHf), 6.69 (8 H, m, CHg)

FTIR ( $\text{CH}_2\text{Cl}_2$ )  $\nu(\text{CO}) = 2023(\text{s}), 1925(\text{b}), 1887(\text{b})$

Mass Spec.(ES)  $m/z$ : Calculated for  $\text{C}_{41}\text{H}_{26}\text{N}_2\text{O}_6$   $^{187}\text{Re}^+$  (M-Cl): 829.1348. Found: 829.1367

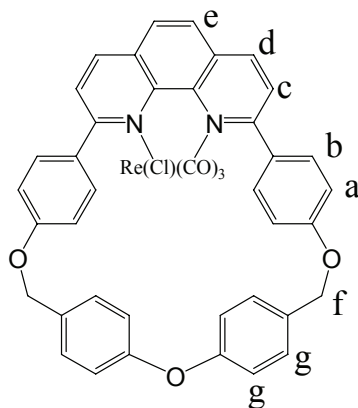

Structure of  $[\text{Re}(\text{Cl})(\text{CO})_3(\text{m27})]$ . Labels a-g show the NMR assignment.

**[Re(Etpy)(CO)<sub>3</sub>(dap)]PF<sub>6</sub>**

FTIR (MeCN)  $\nu(\text{CO}) = 2029(\text{s}), 1923(\text{b})$

Mass Spec.(ES) m/z: Calculated for C<sub>36</sub>H<sub>29</sub>N<sub>3</sub>O<sub>5</sub> <sup>187</sup>Re<sup>+</sup> (M<sup>+</sup>): 770.1654. Found: 770.1666

**[Re(Etpy)(CO)<sub>3</sub>(m27)]PF<sub>6</sub>**

FTIR (MeCN)  $\nu(\text{CO}) = 2029(\text{s}), 1924(\text{b})$

Mass Spec.(Low res ES) m/z: Calculated for C<sub>48</sub>H<sub>35</sub>N<sub>3</sub>O<sub>6</sub> <sup>187</sup>Re (M<sup>+</sup> + arginine): 1110.3.

Found: 1110.4

**[Re(Etpy)(CO)<sub>3</sub>(m30)]PF<sub>6</sub>**

FTIR (MeCN)  $\nu(\text{CO}) = 2028(\text{s}), 1921(\text{b})$

Mass Spec.(Low res ES) m/z: Calculated for C<sub>44</sub>H<sub>43</sub>N<sub>3</sub>O<sub>9</sub> <sup>187</sup>Re (M<sup>+</sup> + arginine): 1118.4.

Found: 1118.4

**FIGURES**

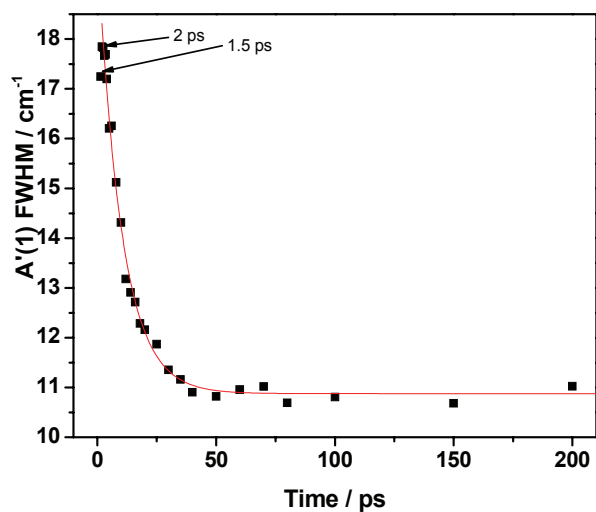

**Fig. S1.** Time-dependence of the excited-state A'(1)  $\nu(\text{CO})$  bandwidth (FWHM) of [Re(Cl)(CO)<sub>3</sub>(dap)] in CH<sub>2</sub>Cl<sub>2</sub>. Time constant  $10.1 \pm 0.5$  ps. Note the band broadening between 1.5 and 2 ps.

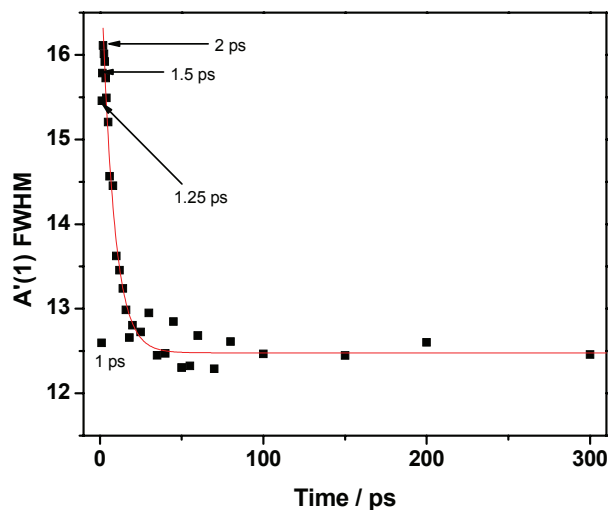

**Fig. S2.** Time-dependence of the excited-state A'(1)  $\nu(\text{CO})$  bandwidth (FWHM) of  $[\text{Re}(\text{Cl})(\text{CO})_3(\text{m27})]$  in  $\text{CH}_2\text{Cl}_2$ . Time constant  $7.5 \pm 0.5$  ps. Note the band broadening between 1 and 2 ps.

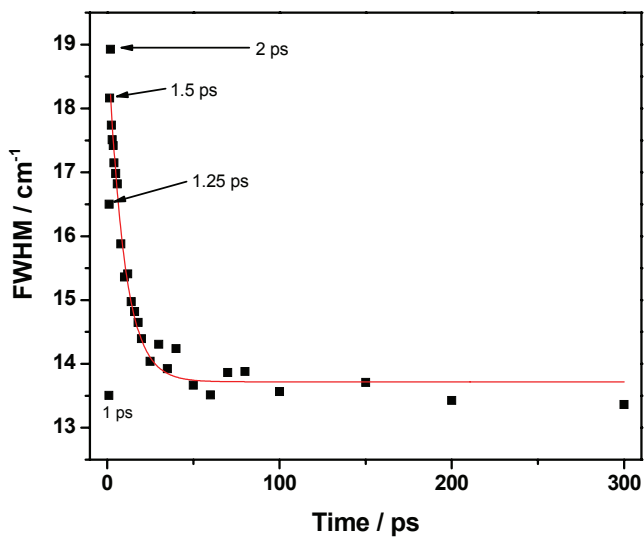

**Fig. S3.** Time-dependence of the excited-state A'(1)  $\nu(\text{CO})$  bandwidth (FWHM) of  $[\text{Re}(\text{Cl})(\text{CO})_3(\text{m30})]$  in  $\text{CH}_2\text{Cl}_2$ . Time constant  $9.3 \pm 0.8$  ps. Note the band broadening between 1 and 2 ps. Fitted curve starts at 2 ps.

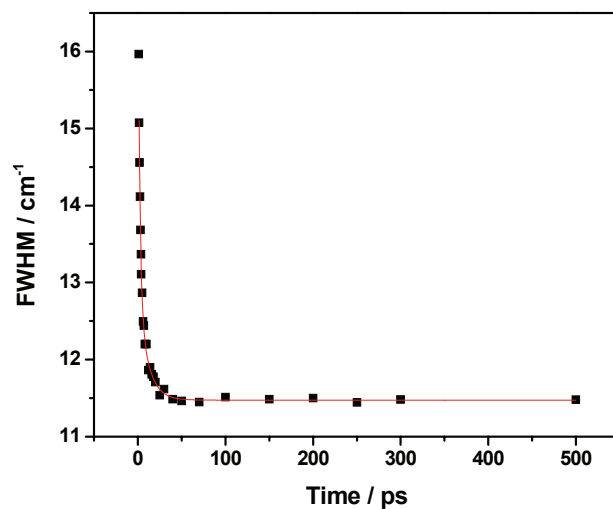

**Fig. S4.** Time-dependence of the excited-state A'(1)  $\nu(\text{CO})$  bandwidth (FWHM) of  $[\text{Re}(\text{Cl})(\text{CO})_3(\text{phen})]$  in  $\text{CH}_2\text{Cl}_2$ . Biexponential narrowing with time constants of  $2.0 \pm 0.2$  and  $10.6 \pm 1.6$  ps. Fitted curve starts at 1.5 ps.
